# Supplementary material
Source: publisher figshare collection journal article supplement (https://acs.figshare.com/ndownloader/files/4177840)
Supplement: Supplementary file 1 [file 4177840]

## Supporting Information

### Two Unique Entangling Cd(II) Coordination Frameworks Constructed by Square Cd<sub>4</sub>-building blocks and auxiliary N,N'-Donor Ligands

Dong-Sheng Li,<sup>\*,†</sup> Peng Zhang,<sup>†</sup> Jun Zhao,<sup>†</sup> Zi-Fan Fang,<sup>†</sup> Miao Du,<sup>\*,‡</sup>  
Kun Zou,<sup>†</sup> and Yi-Qiang Mu<sup>†</sup>

<sup>†</sup>*College of Mechanical & Material Engineering, Research Institute of Materials, China Three Gorges University, Yichang 443002, China;* <sup>‡</sup>*College of Chemistry, Tianjin Key Laboratory of Structure and Performance for Functional Molecule, Tianjin Normal University, Tianjin 300387, China.*

### *Cryst. Growth Des. (Communication)*

\* Corresponding authors

E-mail: lidongsheng1@126.com. Tel./Fax: +86-717-6397516 (D.-S. Li).

E-mail: dumiao@public.tpt.tj.cn. Tel./Fax: +86-22-23766556 (M. Du).

## 1. Materials and General Methods

All solvents and reagents for synthesis and analysis were commercially available and used as received. The FT-IR spectra were recorded as KBr pellets on a FTIR Nexus spectrophotometer. Elemental analysis of C, H, and N was performed on a Perkin-Elmer 2400 Series II analyzer. X-ray powder diffraction (XRPD) patterns for microcrystalline samples were measured on a Rigaku Ultima IV diffractometer for Cu K $\alpha$  radiation ( $\lambda = 1.5406 \text{ \AA}$ ), with a scan speed of 2 deg/min and a step size of 0.02 deg in  $2\theta$ . The calculated PXRD patterns were obtained from the single-crystal X-ray diffraction data. Thermogravimetric (TG) analysis was taken on a NETZSCH STA 449C microanalyzer in an atmosphere of nitrogen at a heating rate of  $10 \text{ }^{\circ}\text{C}\cdot\text{min}^{-1}$ . Solid-state fluorescent spectra were carried out on a Perkin-Elmer LS50B luminescence spectrophotometer.

## 2. Crystallographic Data Collection and Refinement

Single-crystal X-ray diffraction data collection for complexes **1** and **2** was carried out at room temperature on a RIGAKU RAXIS-RAPID diffractometer with Mo K $\alpha$  radiation ( $\lambda = 0.71073 \text{ \AA}$ ). The structures were solved by direct methods using the SHELXS program of the SHELXTL package and refined by full-matrix least-squares methods with SHELXL.<sup>1</sup> Metal centers in each complex were located from the  $E$ -maps and other non-hydrogen atoms were located in successive difference Fourier syntheses, which were refined with anisotropic thermal parameters on  $F^2$ . The hydrogen-atoms of the organic ligands were generated theoretically onto the specific atoms and refined isotropically with fixed thermal factors. Selected bond lengths for complexes **1** and **2** are listed in Table S1.

## References

- (1) Sheldrick, G. M. SHELXTL NT, *Program for Solution and Refinement of Crystal Structures*, version 5.1, University of Göttingen, Germany, 1997.

**Table S1** Selected bond distances (Å) and angles (deg) for complexes **1** and **2**.

|                     |            |                     |            |
|---------------------|------------|---------------------|------------|
| <b>Complex 1</b>    |            |                     |            |
| Cd(1)-N(3)          | 2.266(4)   | Cd(1)-N(1)          | 2.286(3)   |
| Cd(1)-N(2)#1        | 2.334(4)   | Cd(1)-O(4)#1        | 2.359(4)   |
| Cd(1)-O(5)          | 2.364(3)   | Cd(1)-O(1)          | 2.452(4)   |
| N(3)-Cd(1)-N(1)     | 153.34(12) | N(3)-Cd(1)-N(2)#1   | 96.76(13)  |
| N(1)-Cd(1)-N(2)#1   | 94.46(12)  | N(3)-Cd(1)-O(4)#1   | 106.10(13) |
| N(1)-Cd(1)-O(4)#1   | 100.27(12) | N(2)#1-Cd(1)-O(4)#1 | 73.17(11)  |
| N(3)-Cd(1)-O(5)     | 83.35(12)  | N(1)-Cd(1)-O(5)     | 95.68(11)  |
| N(2)#1-Cd(1)-O(5)   | 156.51(12) | O(4)#1-Cd(1)-O(5)   | 84.19(11)  |
| N(3)-Cd(1)-O(1)     | 81.94(12)  | N(1)-Cd(1)-O(1)     | 71.48(11)  |
| N(2)#1-Cd(1)-O(1)   | 118.82(12) | O(4)#1-Cd(1)-O(1)   | 165.27(11) |
| O(5)-Cd(1)-O(1)     | 84.53(12)  |                     |            |
| <b>Complex 2</b>    |            |                     |            |
| Cd(2)-N(3)          | 2.234(3)   | Cd(2)-N(6)#1        | 2.272(3)   |
| Cd(1)-N(4)#2        | 2.233(3)   | Cd(2)-N(5)          | 2.351(3)   |
| Cd(1)-N(2)          | 2.310(3)   | Cd(1)-N(1)#3        | 2.235(3)   |
| Cd(1)-O(8)#2        | 2.403(3)   | Cd(1)-O(1)          | 2.377(2)   |
| Cd(2)-O(9)          | 2.288(3)   | Cd(1)-O(4)#3        | 2.489(3)   |
| Cd(2)-O(5)          | 2.410(3)   | Cd(2)-O(2)          | 2.455(2)   |
| N(3)-Cd(2)-N(6)#1   | 162.11(11) | N(3)-Cd(2)-O(9)     | 95.08(11)  |
| N(6)#1-Cd(2)-O(9)   | 101.06(12) | N(3)-Cd(2)-N(5)     | 93.00(11)  |
| N(6)#1-Cd(2)-N(5)   | 92.89(11)  | O(9)-Cd(2)-N(5)     | 96.20(11)  |
| N(3)-Cd(2)-O(5)     | 72.48(10)  | N(6)#1-Cd(2)-O(5)   | 89.65(10)  |
| O(9)-Cd(2)-O(5)     | 154.42(10) | N(5)-Cd(2)-O(5)     | 106.49(11) |
| N(3)-Cd(2)-O(2)     | 95.50(10)  | N(6)#1-Cd(2)-O(2)   | 79.11(10)  |
| O(9)-Cd(2)-O(2)     | 82.60(9)   | N(5)-Cd(2)-O(2)     | 171.48(10) |
| O(5)-Cd(2)-O(2)     | 76.65(9)   | N(4)#2-Cd(1)-N(1)#3 | 157.47(11) |
| N(4)#2-Cd(1)-N(2)   | 101.82(11) | N(1)#3-Cd(1)-N(2)   | 96.96(10)  |
| N(4)#2-Cd(1)-O(1)   | 93.40(11)  | N(1)#3-Cd(1)-O(1)   | 104.21(10) |
| N(2)-Cd(1)-O(1)     | 72.10(9)   | N(4)#2-Cd(1)-O(8)#2 | 72.92(10)  |
| N(1)#3-Cd(1)-O(8)#2 | 90.47(10)  | N(2)-Cd(1)-O(8)#2   | 169.03(10) |
| O(1)-Cd(1)-O(8)#2   | 98.29(10)  | N(4)#2-Cd(1)-O(4)#3 | 93.92(10)  |
| N(1)#3-Cd(1)-O(4)#3 | 71.39(9)   | N(2)-Cd(1)-O(4)#3   | 96.90(10)  |
| O(1)-Cd(1)-O(4)#3   | 167.86(10) | O(8)#2-Cd(1)-O(4)#3 | 93.11(11)  |

Symmetry transformations used to generate equivalent atoms: #1:  $y+1/2$ ,  $-x+1/2$ ,  $-z+1/2$  for **1**; #1:  $-x+2$ ,  $y-1/2$ ,  $-z+3/2$ ; #2:  $-x+1$ ,  $-y+1$ ,  $-z+1$ ; #3:  $x+1/2$ ,  $-y+1/2$ ,  $-z+1$  for **2**.

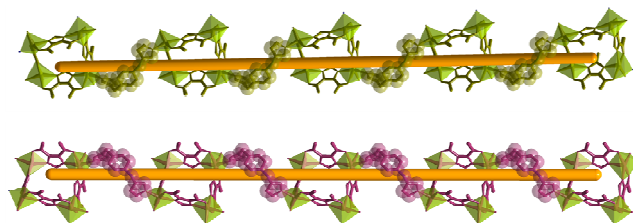

**Figure S1.** Left-handed (top) and right-handed (bottom) helical chains in **1** constructed from Cd<sub>4</sub>-squares and cis-bix ligands.

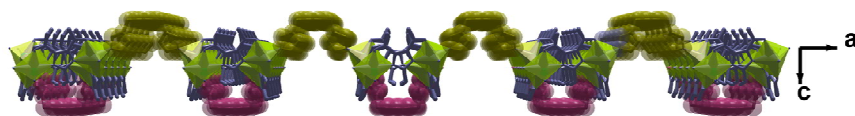

**Figure S2.** View of the 2D layer in **1** along the [010] direction.

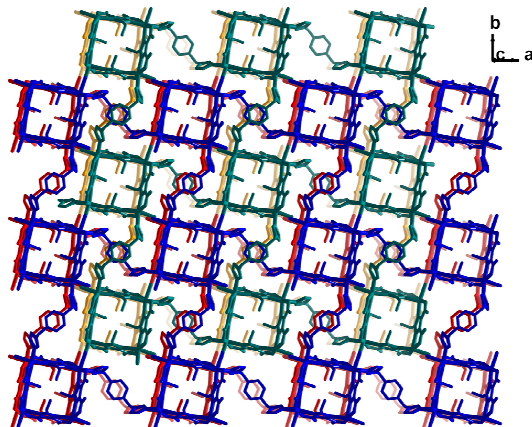

**Figure S3.** View of the 2D → 3D parallel polycatenate architecture in **1**.

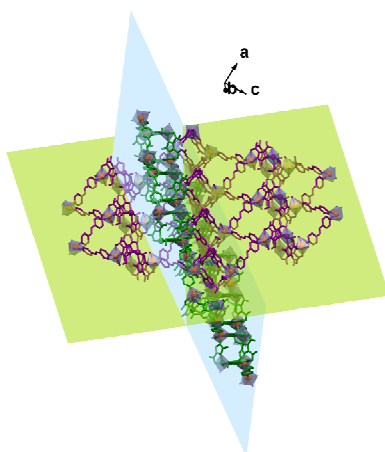

**Figure S4.** Two sets of layers in **2** oriented towards different directions with an angle of 71.75°.

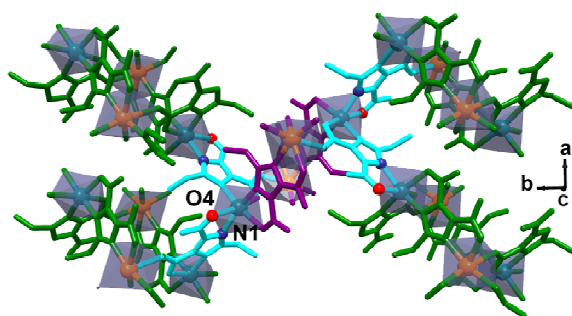

**Figure S5.** The linking of  $\mu_3$ -HEtIDC<sup>2-</sup> anions in N',O'-chelating mode in **2**.

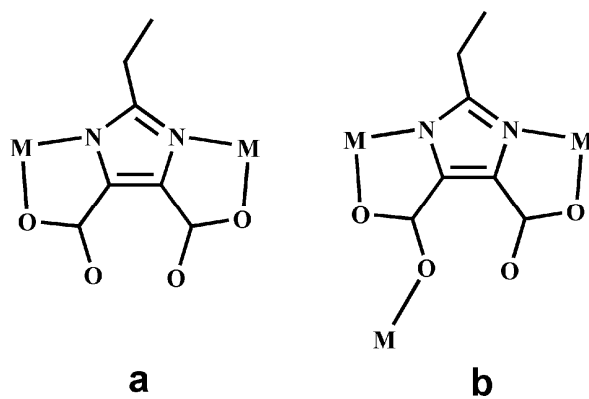

**Figure 5.** Coordination modes of HEtIDC<sup>2-</sup> anions. (a)  $\mu_2$ - $\kappa$ N,O: $\kappa$ N',O'; (b)  $\mu_3$ - $\kappa$ N,O: $\kappa$ O: $\kappa$ N',O'.

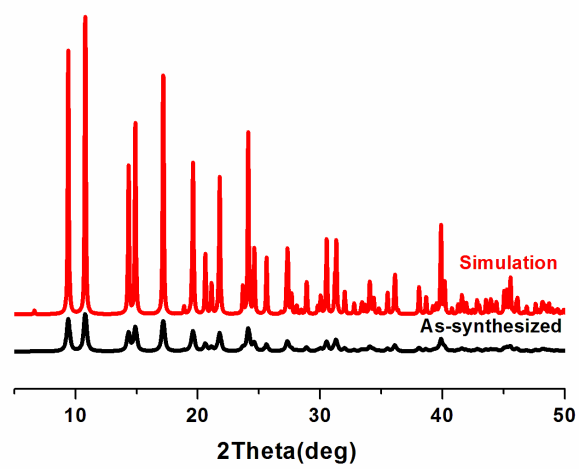

(a)

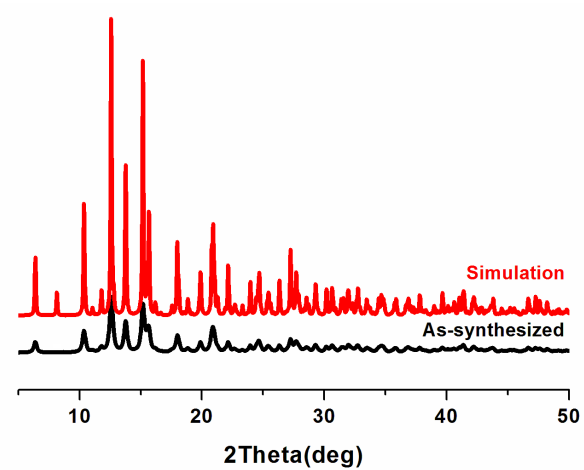

(b)

**Figure S6.** Simulated and experimental PXRD patterns for complexes **1** (a) and **2** (b).

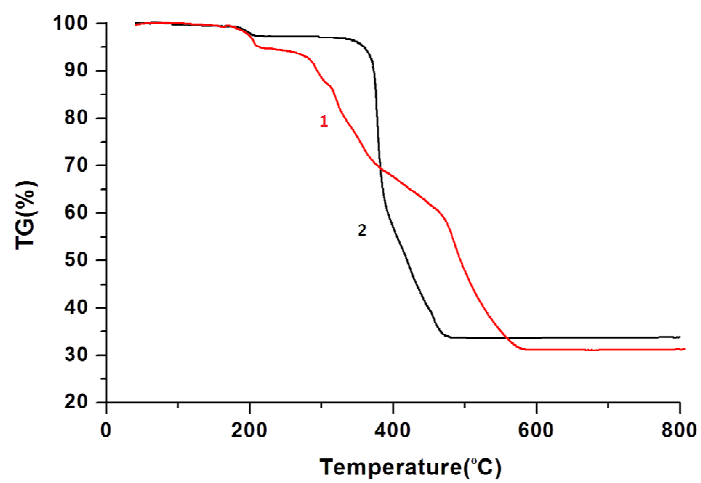

**Figure S7.** TG curves of complexes **1** and **2**.

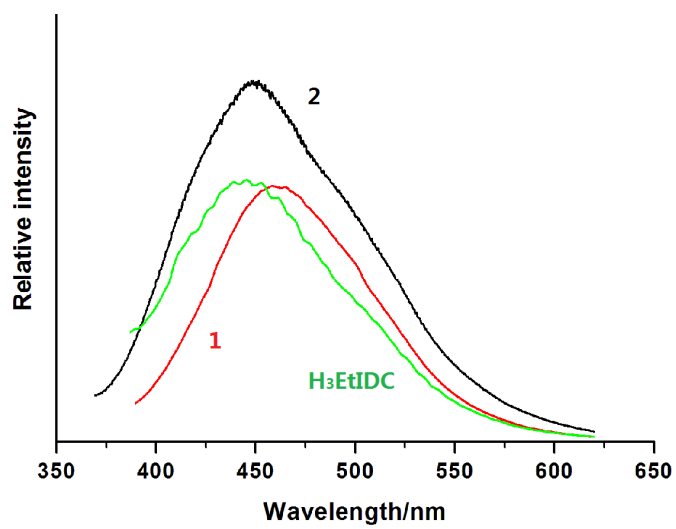

**Figure S8.** Solid-state emission spectra of **1** and **2** and the free ligand H<sub>3</sub>EtIDC.
